# Supplementary material for: Classification of Various Marijuana Varieties by Raman Microscopy and Chemometrics
Source: MDPI journal article supplement (doi:10.3390/toxics10030115), 2022-02-28
Supplement: s1 [file s1]

# Supplementary Materials: Classification of Various Marijuana Varieties by Raman Microscopy and Chemometrics

Luis Ramos-Guerrero, Gemma Montalvo, Marzia Cosmi, Carmen García-Ruiz and Fernando E. Ortega-Ojeda

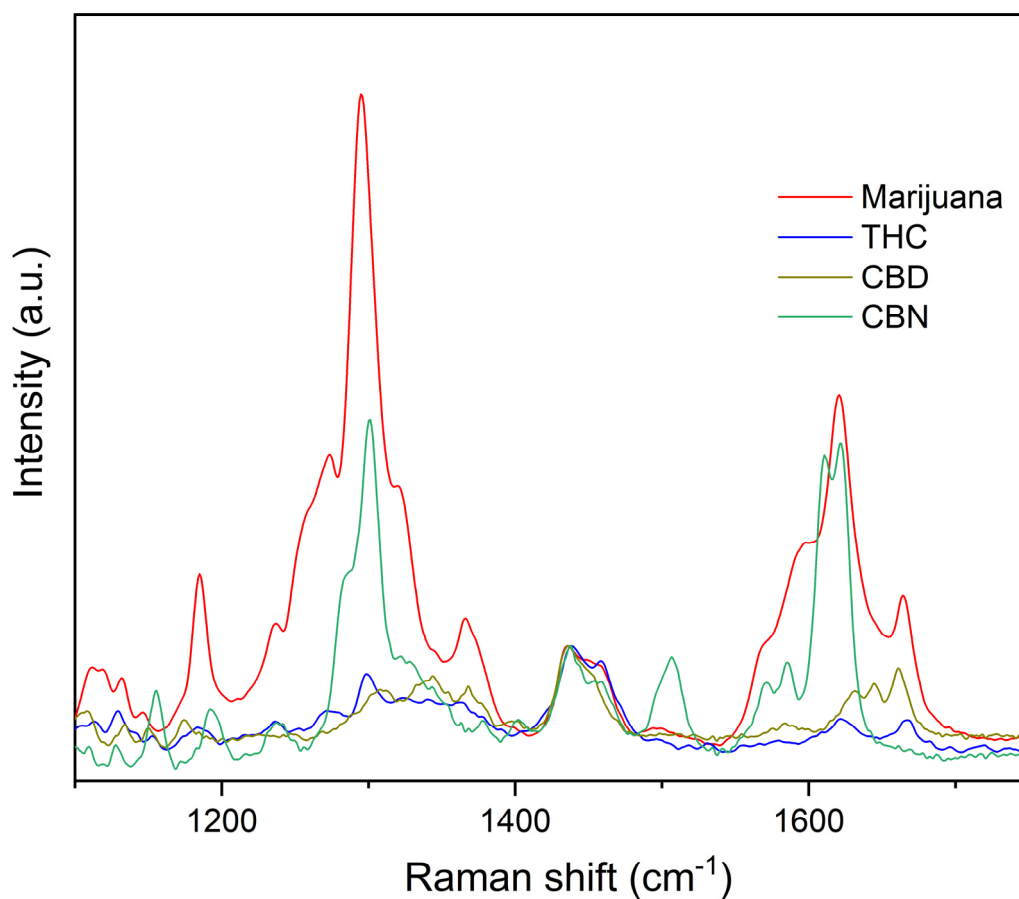

**Figure S1.** Normalized Raman spectra (at 1438  $\text{cm}^{-1}$ ) of those in Figure 3.

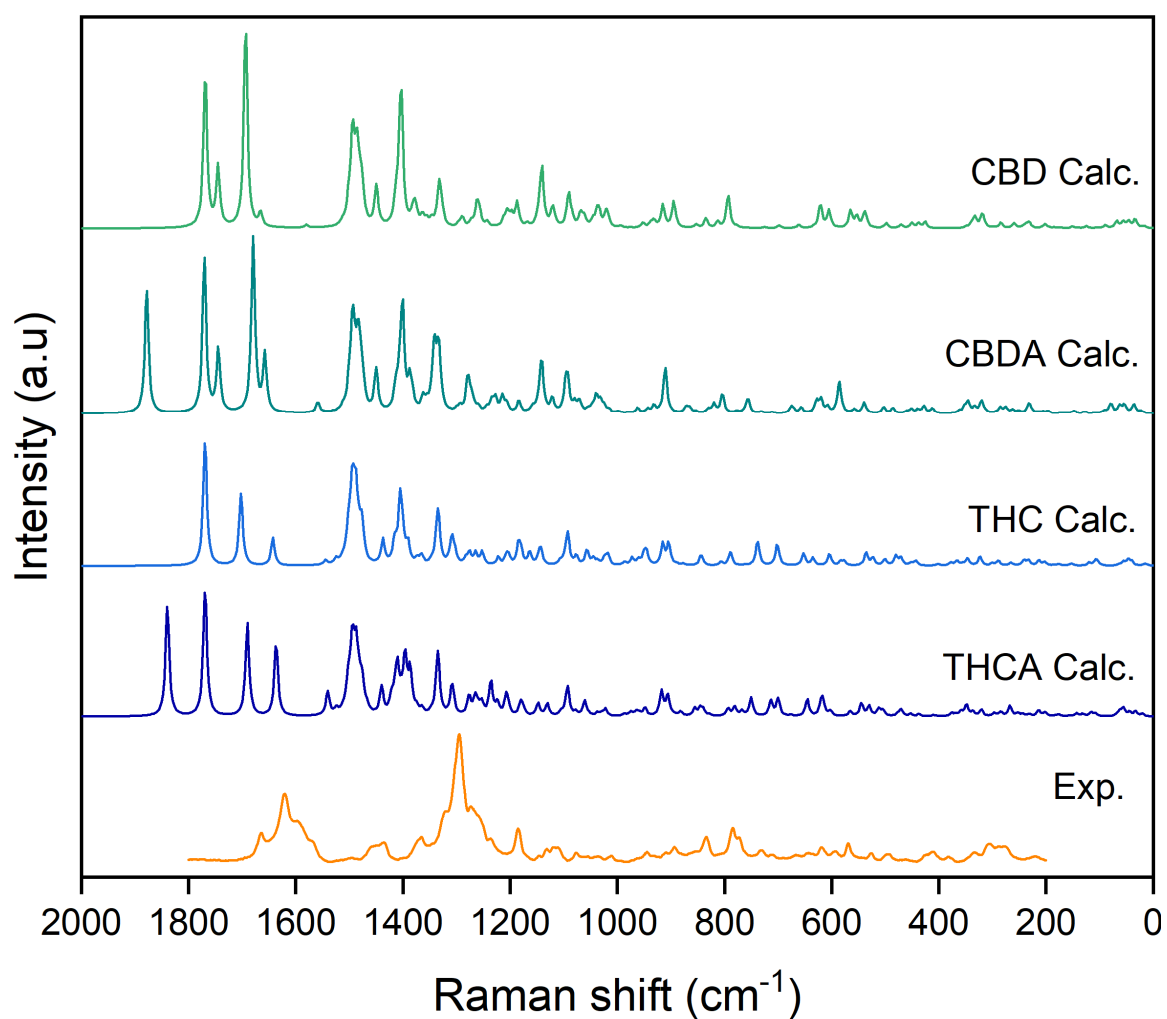

**Figure S2.** Experimental Raman spectrum from the marijuana trichomes and quantum chemical simulated spectra for the main expected marijuana cannabinoids at the Def2-TZVP calculation model.

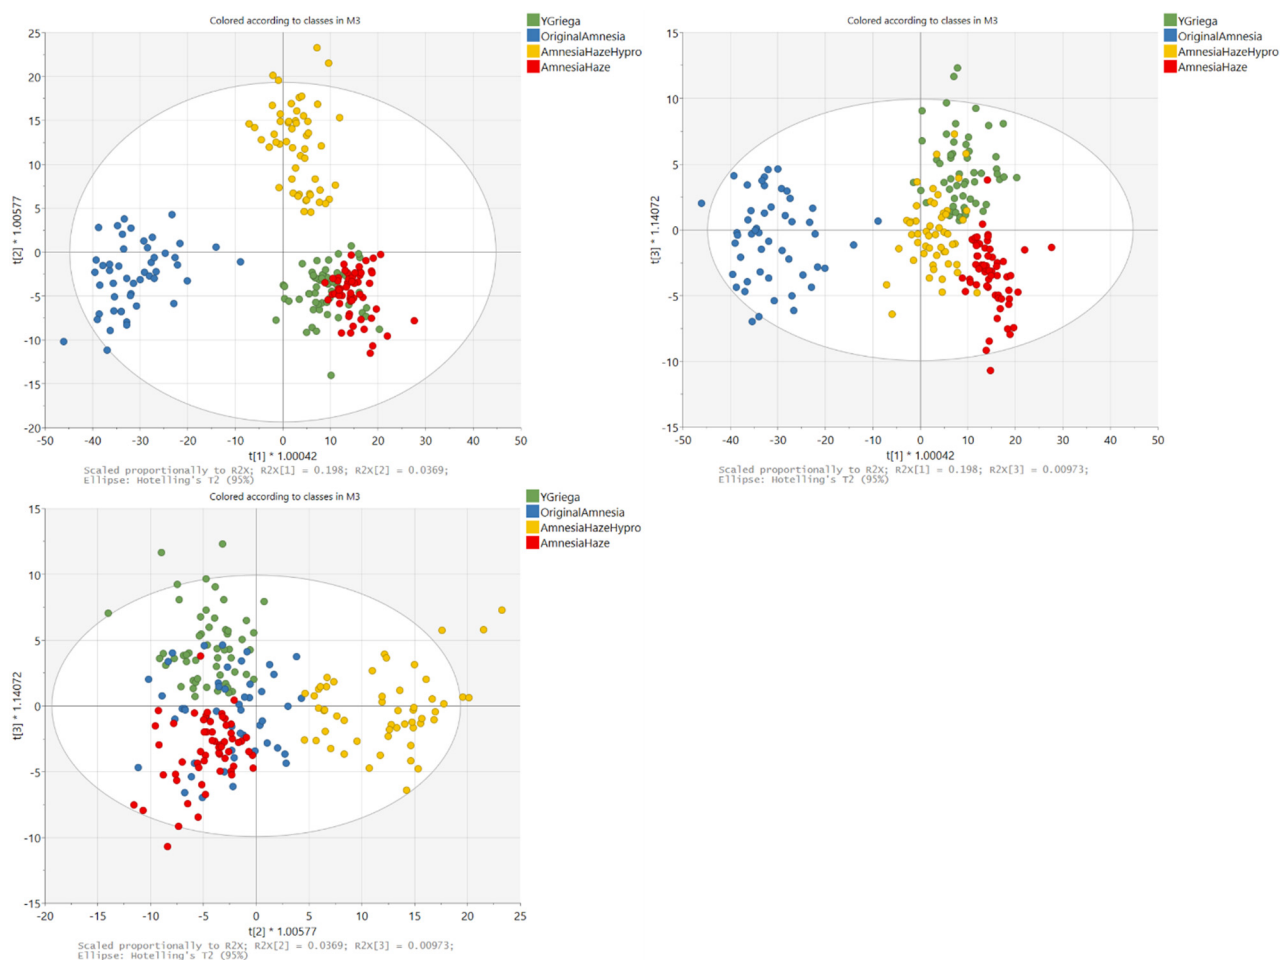

**Figure S3.** 2D Scores Scatter plots representing the three planes forming the 3D Scores Scatter plot from the OPLS-DA model (Figure 6) applied to the Sativa marijuana Raman spectra in order to differentiate the sample type.

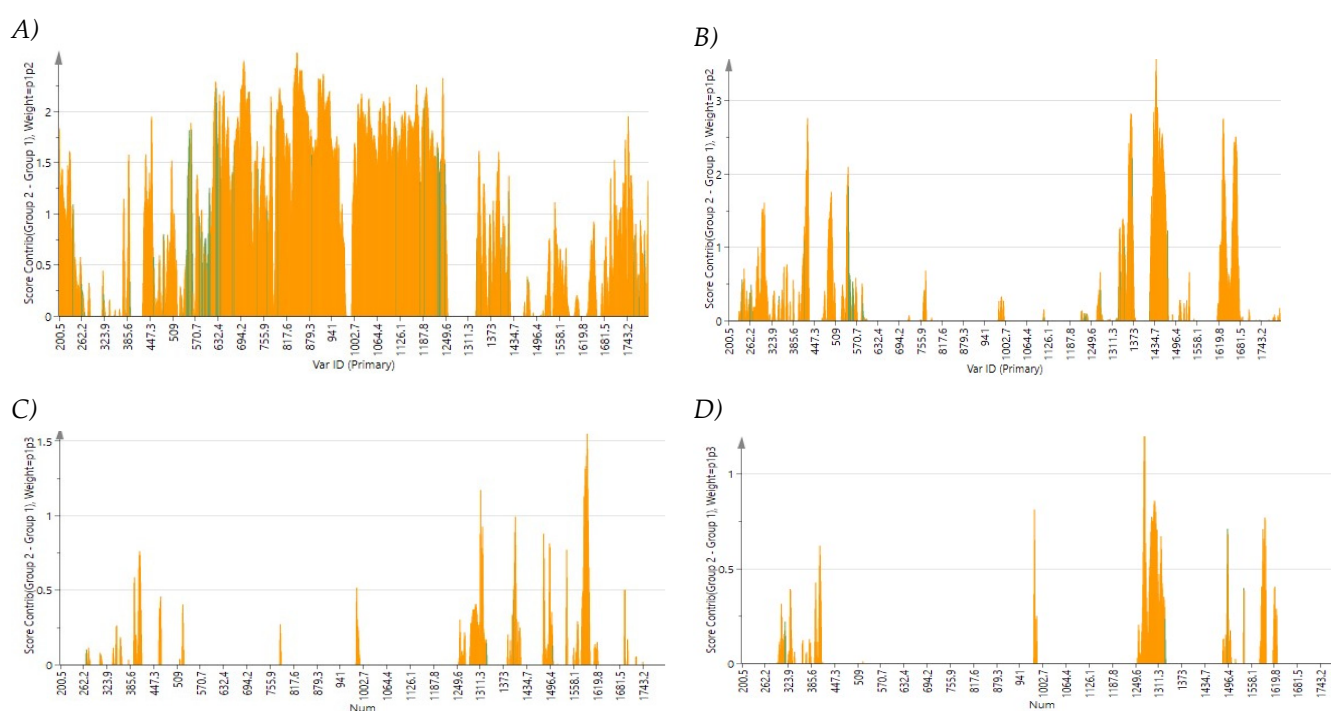

**Figure S4.** Contribution (loadings-focused) plots for the various Sativa samples analysed in this work. (A) Original Amnesia (top part) compared to the rest of the samples. (B) Amnesia Haze Hypro (top part) compared to the rest of the

---

samples. (C) YGriega (top part) compared to the rest of the samples. (D) Amnesia Haze (top part) compared to the rest of the samples.
